# Supplementary material for: Potential impact of eliminating illicit trade in cigarettes: a demand-side perspective
Source: HighWire-hosted journal article supplement (doi:10.1136/tobaccocontrol-2020-055980), 2020-11-03
Supplement: tobaccocontrol-2020-055980supp001_data_supplement.pdf [file tobaccocontrol-2020-055980supp001_data_supplement.pdf]

## Supplementary file: Mexico example

**Table 1. Baseline estimations**

|                                              |              |
|----------------------------------------------|--------------|
| <b><i>Inputs and parameters</i></b>          |              |
| WHO region                                   | AMR          |
| Income group                                 | LMIC         |
| Illicit group                                | B (7-15%)    |
| Share of illicit market (%) (1)              | 8.2%         |
| Cheap illicit market (% illicit)             | 33%          |
| Smoking rate (% adults)                      | 12.8%        |
| Total smokers (000s)                         | 12,249       |
| Legal cigarettes (million sticks)            | 56,000       |
| <b><i>Baseline estimation</i></b>            |              |
| Total cigarettes (million sticks):           | 61,002       |
| Legal cigarettes (million sticks)            | 56,000       |
| <b>Illicit cigarettes (million sticks):</b>  | <b>5,002</b> |
| Cheap illicit cigarettes (million sticks)    | 1,651        |
| Other illicit cigarettes (millions sticks)   | 3,351        |
| Total smokers (000s):                        | 12,249       |
| Smokers of legal cigarettes (000s)           | 11,245       |
| <b>Smokers of illicit cigarettes (000s):</b> | <b>1,004</b> |
| Smokers of cheap illicit cigarettes (000s)   | 331          |
| Smokers of other illicit cigarettes (000s)   | 673          |
| Sticks per day (all smokers)                 | 13.6         |

Notes: (1) Saenz de Miera Juarez et al (2019).

**Table 2. Elimination scenario (gross impact)**

| <b><i>Inputs and parameters</i></b>               |              |
|---------------------------------------------------|--------------|
| Smokers of cheap illicit cigarettes               |              |
| Price increase                                    | 55%          |
| Price elasticity                                  | -0.8         |
| Price prevalence elasticity                       | -0.4         |
| Tax per pack (USD/20 sticks)                      | 1.0          |
| Smokers of other illicit cigarettes               |              |
| Price increase                                    | 27.5%        |
| Price elasticity                                  | -0.5         |
| Price prevalence elasticity                       | -0.25        |
| Tax per pack (USD/20 sticks)                      | 1.8          |
| <b><i>Elimination scenario (gross impact)</i></b> |              |
| <b>Smokers of illicit cigarettes (000s):</b>      | <b>1,004</b> |
| Shifting to the legal market (000s)               | 912          |
| Quitting smoking (000s)                           | 92           |
| Smokers of cheap illicit cigarettes (000s):       | 331          |
| Shifting to the legal market (000s)               | 279          |
| Quitting smoking (000s)                           | 53           |
| Smokers of other illicit cigarettes (000s):       | 673          |
| Shifting to the legal market (000s)               | 633          |
| Quitting smoking (000s)                           | 39           |
| <b>Illicit cigarettes (million sticks):</b>       | <b>5,002</b> |
| Shifting to the legal market (million sticks)     | 4,134        |
| Decreased consumption (million sticks)            | 868          |
| Cheap illicit cigarettes (million sticks):        | 1,651        |
| Shifting to the legal market (million sticks)     | 1,165        |
| Decreased consumption (million sticks)            | 486          |
| Other illicit cigarettes (million sticks)         | 3,351        |
| Shifting to the legal market (millions sticks)    | 2,969        |
| Decreased consumption (million sticks)            | 382          |

**Table 3. Elimination scenario (net impact)**

| <i>Elimination scenario (net impact)</i>                         |               |
|------------------------------------------------------------------|---------------|
| <b>Total smokers (000s):</b>                                     | <b>12,157</b> |
| Baseline smokers of legal cigarettes (000s)                      | 11,245        |
| Former illicit smokers that shift (000s)                         | 912           |
| Change in total smokers <i>c.f.</i> baseline (000s)              | -92           |
| % change in total smokers <i>c.f.</i> baseline (%)               | -0.8%         |
| <b>Total cigarettes (million sticks):</b>                        | <b>60,134</b> |
| Baseline legal cigarette sticks (000s)                           | 56,000        |
| Consumption from illicit smokers shifting (000s)                 | 4,134         |
| Change in total consumption <i>c.f.</i> baseline (000s)          | -868          |
| % change in total consumption <i>c.f.</i> baseline (%)           | -1.4%         |
| <b>Sticks per day (all smokers)</b>                              | <b>13.6</b>   |
| % change in sticks per day (all smokers)                         | -1.2%         |
| <b>Change in tax revenue <i>c.f.</i> baseline (USD millions)</b> | <b>327</b>    |
| % change in tax revenue <i>c.f.</i> baseline (%)                 | 6.5%          |
